# Supplementary material for: Mechanical-Chemical-Mineralogical Controls on Permeability Evolution of Shale Fractures
Source: Hindawi journal article supplement (doi:10.1155/2018/7801843), 2018-09-10
Supplement: f1 [file 7801843.f1.pdf]

## Supplementary material

### Appendix

#### A1. Determination of calcite dissolution rate $k_1$ , $k_2$

The multiple parameter model is built and equation (17) could be used to quantify the fracture aperture evolution in shale fractures. However, three critical parameters  $k_1$  ,  $k_2$  and  $R_c$  should be decided before forecast permeability evolution.

$k_1$  is the dissolution rate of mineral on contacting asperities where pressure solution happens while  $k_2$  is dissolution of mineral on free-face area where free-face dissolution occurs. However, in our experiment, one limitation of our research is impossibility of measuring the fluid acidity on the contacting asperities.

As for  $k_1$  value, studies show that during core flooding experiments, the fluid is considered to be stagnant at the contacting asperities due to the water film effect and hydronium ions are consumed for calcite dissolution by stagnant water film which will result to a fluid acidity on contacting asperities decreases very quickly [1]. Researches show that when the fluid pH value larger than 6.0, the change of calcite rate dissolution is not significant[2,3]. Considering high reactivity of calcite, it is reasonable to assume the  $k_1$  equals to calcite dissolution rate under neutral condition and the  $k_1$  value is set as  $7.39 \times 10^{-7}$  mol/m<sup>2</sup>s during calculation [1].

As for  $k_2$  value, which means mineral dissolution rate in free-face area. Studies showed that dissolution rate of calcite ( $7.39 \times 10^{-7}$  mol/m<sup>2</sup>s) is much higher than quartz ( $2.51 \times 10^{-9}$  mol/m<sup>2</sup>s) under neutral condition (pH=7). In addition, calcite mineral has a larger dissolution rate when the fluid acidity is higher and quartz dissolution rate is almost not affected by fluid acidity. Compared with mineral compositions in shale, calcite mineral plays a dominant role in fracture aperture evolution through pressure solution and

free-face dissolution process. Hence,  $k_2$  value in equation (17) could be replaced by the dissolution rate of calcite which neglects the quartz mineral due to its low dissolution rate even though its content is pretty large in shale.

The calcite dissolution rate is controlled by PWP equation [2] and its value has been obtained under different pH conditions [3]. For our experimental conditions, the values are listed in **Table A1**.

**Table A1** Calcite dissolution used in multiple parameter model

| Fluid pH | $k_1$ (mol/m <sup>2</sup> s) | $k_2$ (mol/m <sup>2</sup> s) |
|----------|------------------------------|------------------------------|
| 4.0      | $7.39 \times 10^{-7}$        | $9.23 \times 10^{-5}$        |
| 5.0      | $7.39 \times 10^{-7}$        | $9.55 \times 10^{-6}$        |
| 6.0      | $7.39 \times 10^{-7}$        | $1.12 \times 10^{-6}$        |
| 7.0      | $7.39 \times 10^{-7}$        | $7.39 \times 10^{-7}$        |

## **A2. Determination of relationship between contact area ratio ( $R_c$ ) and confining stress**

The contact-area ratio ( $R_c$ ) is another crucial parameter in multiple parameter model to forecast fracture aperture evolution. Research showed that contact-area ratio is only controlled by confining stress[4]. As mentioned before, one limitation of our research is impossibility to measure contact-area ratio directly. Here, we use effective hydraulic aperture as a bridge: firstly, the relationship between contact-area ratio and effective hydraulic aperture is built by profilometry method; then, the relationship between fracture aperture and confining stress is constrained by experiment. Combing the profilometry results and experimental data, the relationship between fracture effective hydraulic aperture and confining stress is fitted for different shale.

Longmaxi shale is chosen as an example to describe the fitting process.

The relationship between fracture aperture and contact-area ratio could be obtained by profilometry method [5,6] and tomography in a fracture surface could be described by Gaussian distribution [4]:

$$f(h) = \frac{1}{\sqrt{2\pi\sigma_h^2}} \exp\left(-\frac{h - \langle h \rangle}{2\sigma_h^2}\right) \quad (A1)$$

In this equation,  $h$  is the altitude of fracture surface,  $\sigma_h$  is the root-mean square and  $\langle h \rangle$  is statistical average of fracture surface.

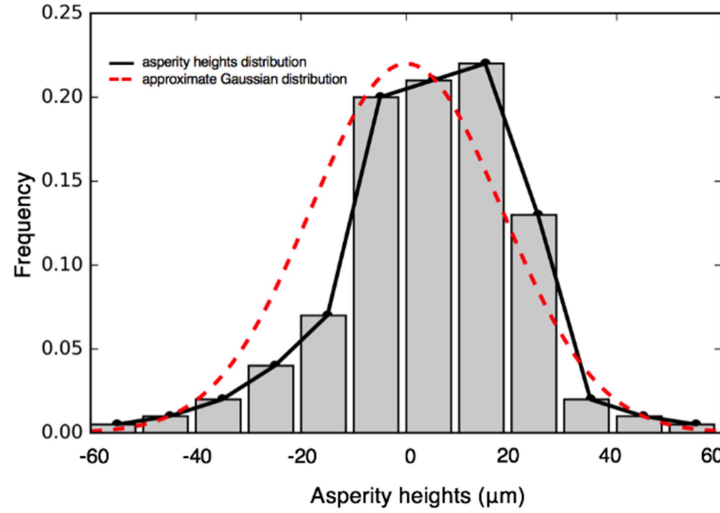

**Figure A1.** The height distribution in Longmaxi shale surface

The height distribution of Longmaix shale is shown in **Figure A1** which is accordance with Gaussian distribution. Firstly, the data is de-skewed and through maintaining the mean planes of fractures parallel, aperture distribution could be determined from point-by-point subtraction of two digitized surface and the arithmetic average aperture is calculated. The contact-area ratio is the number of overlapped datum points between two fracture surfaces. Then, by changing the relative position of two fracture surface, the accordingly relationship between contact-area ratio and fracture aperture is shown in **Figure A2**.

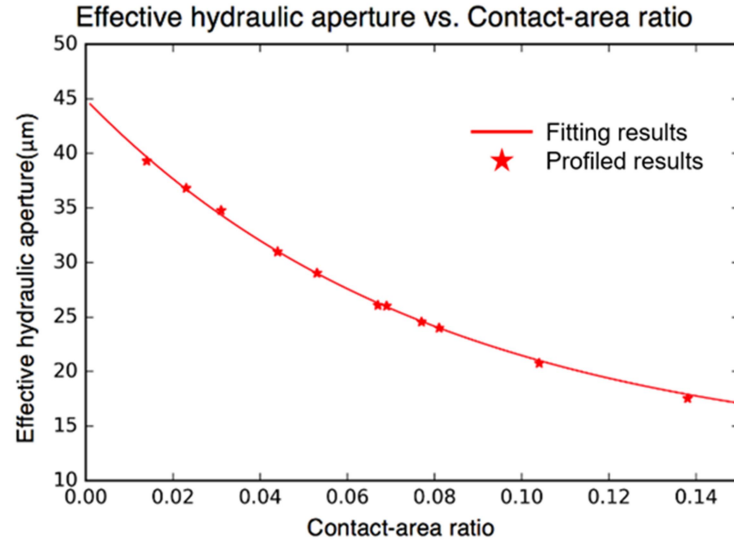

**Figure A2.** The relation between effective hydraulic aperture and contact area ratio

Then, based on regression curve, the relationship between effective hydraulic aperture and contact area ratio is given by:

$$e_h = a_1 + a_2 \exp(-R_c / a_3) \quad (A2)$$

where  $e_h$  is fracture aperture,  $R_c$  is contact-area ratio;  $a_1$ ,  $a_2$  and  $a_3$  are constant.

It should be noted that only  $a_3$  decide the curve shape and  $a_1$  means the initial aperture of fracture surface and  $a_2$  is the initial fracture aperture minus minimum fracture aperture.

After data fitting, the relationship between fracture aperture and contact-area ratio could be expressed as:

$$e_h = 12.05 + 32.89 \times \exp(-R_c / 0.08) \quad (A3)$$

Next, we further constrain the relationship between effective hydraulic aperture and confining stress by experiment. By adjusting the confining stress, the fracture aperture could be estimated by flow rate and results are shown in

**Figure A3.**

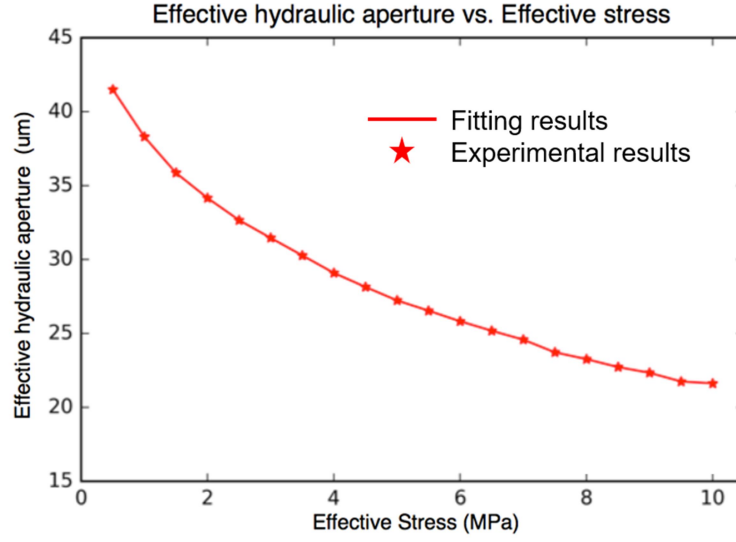

**Figure A3.** The relation between effective hydraulic aperture and effective stress

Confining stress will directly close the fracture aperture, which could be describe by the model [7]:

$$\Delta e_h = \frac{e_{h(0)} - e_{h(r)}}{1 + \frac{K_{nf} \cdot (e_{h(0)} - e_{h(r)})}{\sigma_n}} \quad (A4)$$

where  $K_{nf}$  is the fracture normal stiffness to describe the fracture's ability to resist normal stress  $e_{h(0)}$  is the initial fracture aperture and  $e_{h(r)}$  is the residential fracture aperture  $\sigma_n$  is the confining stress.

After data fitting, the relationship between fracture aperture and confining stress for Longmaxi shale could be expressed as:

$$e_h = 44.94 - \frac{32.89 \cdot \sigma_{conf}}{\sigma_{conf} + 4.1343} \quad (A5)$$

Based on above analysis, the relationship between fracture aperture and contact-area ratio could be expressed as:

$$e_h = 12.05 + 32.89 \times \exp(-R_c / 0.08) \quad (A6)$$

The relationship between contact-area ratio and confining stress could be get as and contact-area ratio for Longmaxi shale could be expressed as equation **A7** and plot in **Figure A4**:

$$R_c = -0.08 \ln(1 - \frac{1}{1 + \frac{4.1352}{\sigma_{conf}}}) \tag{A7}$$

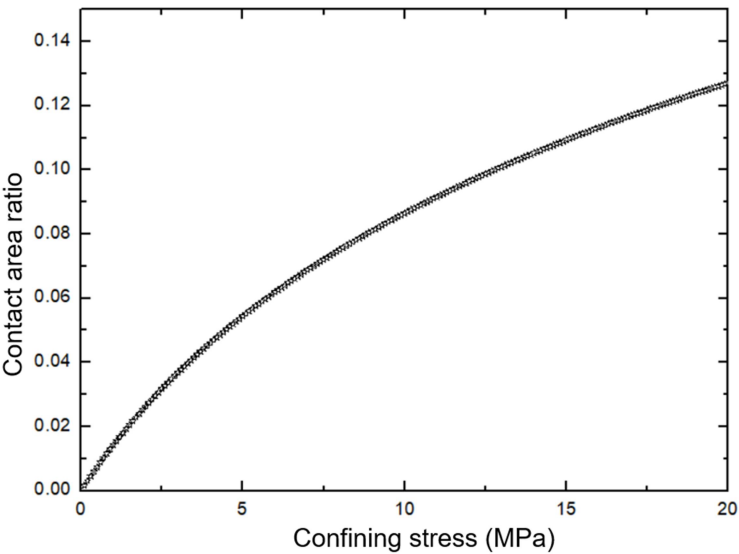

**Figure A4.** The fitting relation between contact-area ratio and effective stress

For our experiment conditions, the  $R_c$  values we used is showed in **Table A2**.

**Table. A2** The contact area ratio used in model

| Confining stress (MPa) | $R_c$ (Longmaxi shale) | $R_c$ (Green River shale) |
|------------------------|------------------------|---------------------------|
| 3                      | 4.4%                   | -                         |
| 5                      | 6.3%                   | -                         |
| 10                     | 9.8%                   | 9.1%                      |

**A3. The simplification process from Eq. (17) to Eq. (18)**

Except for phyllosilicate, the main mineral in Marcellus shale is quartz, who accounts for 36.1% of total weight percentage(As shown in Table 1). As mentioned in equation (7), the critical stress for quartz pressure solution is calculated as:

$$\sigma_c = \frac{E_m(1 - \frac{T}{T_m})}{4V_m} \quad (7)$$

where  $E_m$  and  $T_m$  are heat and temperature of fusion. At room temperature (25°C), the calculated critical stress is 8520 MPa for quartz. Hence, in our experiments, the maximum confining stress is 10 MPa and the stress on contacting asperities is 227.27 MPa (confining stress/contact-area ratio). Hence, the quartz pressure solution can be neglected in our tests.

In addition, the free-face dissolution is largely controlled by fluid acidity. The dissolution rate of quartz under various fluid acidity is summarized in following **Table A3**.

The fracture aperture increasing rate contributed by quartz free-face dissolution is calculated based on following equation:

$$\frac{de_h}{dt} = 2(1 - R_c) \cdot V_m \cdot k_2 \quad (A8)$$

**Table A3.** Comparison between fracture aperture changing rate caused by quartz free-face dissolution and clay swelling

| Fluid<br>pH | Quartz<br>dissolution rate<br>(mol/m <sup>2</sup> s) | $R_c$ | $V_m$<br>(mol <sup>-1</sup> ) | $de_h/dt$ caused by quartz<br>free-face dissolution<br>(μm/min) | $de_h/dt$ caused by<br>clay swelling<br>(μm/min) |
|-------------|------------------------------------------------------|-------|-------------------------------|-----------------------------------------------------------------|--------------------------------------------------|
| 4.0         | $1.27 \times 10^{-12}$                               | 0.10  | $2.27 \times 10^{-5}$         | $3.08 \times 10^{-9}$                                           | -2.33                                            |
| 5.0         | $1.99 \times 10^{-12}$                               | 0.10  | $2.27 \times 10^{-5}$         | $4.89 \times 10^{-9}$                                           | -2.54                                            |
| 6.0         | $1.00 \times 10^{-11}$                               | 0.10  | $2.27 \times 10^{-5}$         | $2.45 \times 10^{-8}$                                           | -3.00                                            |
| 7.0         | $1.26 \times 10^{-11}$                               | 0.10  | $2.27 \times 10^{-5}$         | $3.09 \times 10^{-8}$                                           | -3.15                                            |

Based on **Table A3**, the fracture aperture increasing rate caused by quartz free-face dissolution is  $\sim 10^{-9}$  μm/min, while decreasing rate caused by clay mineral swelling is several microns per minute. Hence, the quartz free-face dissolution is also neglected in analyzing Marcellus shale fracture aperture evolution.

## Reference

- [1] Ishibashi T, McGuire TP, Watanabe N, Tsuchiya N, Elsworth D. Permeability evolution in carbonate fractures: Competing roles of confining stress and fluid pH. *Water Resour Res* 2013;49:2828–42. doi:10.1002/wrcr.20253.

- 142 [2] Plummer LN, Wigley TML, Parkhurst DL. The kinetics of calcite dissolution in CO<sub>2</sub>-water  
143 systems at 5°C to 60°C and 0.0 to 1.0 atm CO<sub>2</sub>. *Am J Sci* 1978;278:179–216.  
144 doi:10.2475/ajs.278.2.179.
- 145 [3] Chou L, Garrels RM, Wollast R. Comparative study of the kinetics and mechanisms of  
146 dissolution of carbonate minerals. *Chem Geol* 1989;78:269–82.  
147 doi:10.1016/0009-2541(89)90063-6.
- 148 [4] Yasuhara H. Evolution of permeability in a natural fracture: Significant role of pressure  
149 solution. *J Geophys Res* 2004;109:B03204. doi:10.1029/2003JB002663.
- 150 [5] Stesky RM, S. S. Hannan. Growth of contact area between rough surfaces under normal  
151 stress. *Geophys Res Lett* 1987;14:550–3.
- 152 [6] Re F, Scavia C. Determination of contact areas in rock joints by X-ray computer  
153 tomography. *Int J Rock Mech Min Sci* 1999;36:883–90.  
154 doi:10.1016/S0148-9062(99)00056-X.
- 155 [7] Bandis SC, Lumsden AC, Barton NR. Fundamentals of rock joint deformation. *Int J Rock*  
156 *Mech Min Sci* 1983;20:249–68. doi:10.1016/0148-9062(83)90595-8.
- 157
